# Supplementary material for: Identification of ASF1A and HJURP by global H3–H4 histone chaperone analysis as a prognostic two-gene model in hepatocellular carcinoma
Source: Springer Nature journal article supplement (doi:10.1038/s41598-024-58368-1), 2024-04-01
Supplement: MOESM3 [file 41598_2024_58368_MOESM3_ESM.pdf]

## Supplementary Material

# Identification of ASF1A and HJURP by Global H3-H4 Histone Chaperone Analysis as a Prognostic Two-gene Model in Hepatocellular Carcinoma

Yongkang Liu<sup>1,2</sup>, Shihui Liu<sup>1</sup>, Rui Jing<sup>1,2</sup>, Congcong Li<sup>1</sup>, Yongqi Guo<sup>1</sup>, Zhiye Cia<sup>1</sup>, Pei Xi<sup>1</sup>, Penggao Dai<sup>1</sup>, Lintao Jia<sup>2</sup>, Shuli Cheng<sup>1,4</sup>, Hongli Zhu<sup>1,\*</sup> and Xiang Zhang<sup>2,3,\*</sup>

\* Correspondence: Xiang Zhang: biozx@fmmu.edu.cn

## 1 Supplementary Figures and Tables

### 1.1 Supplementary Figures

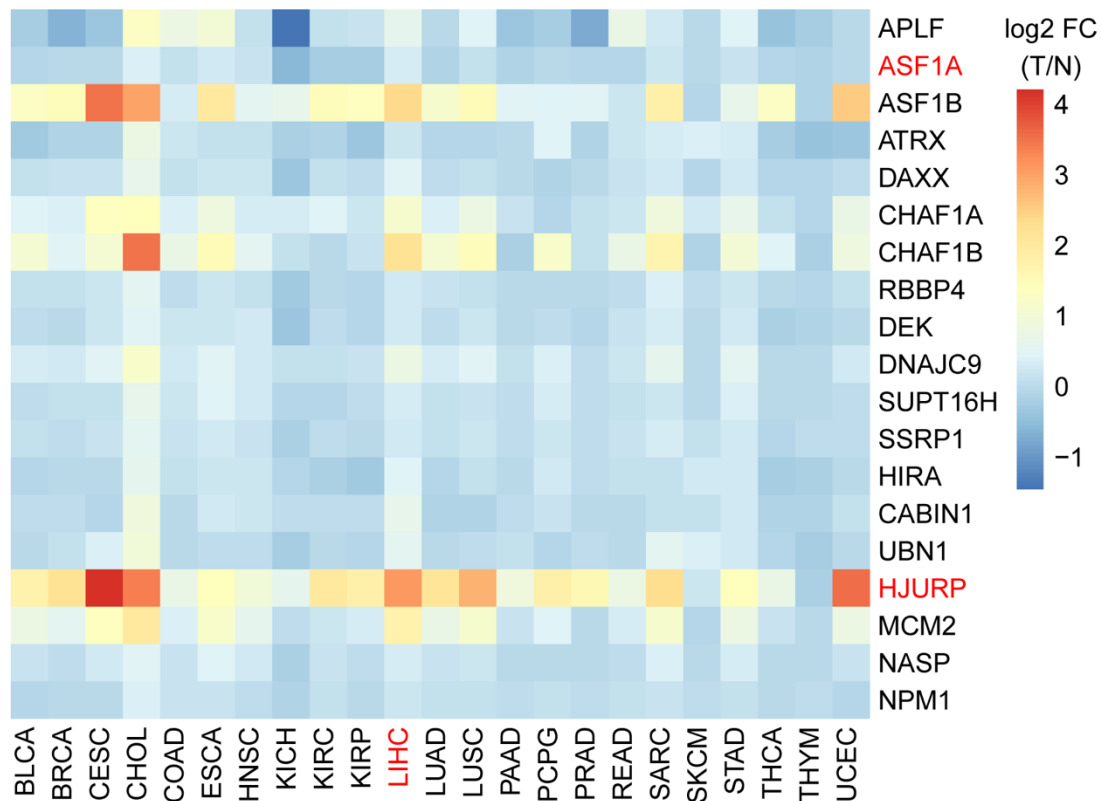

**Supplementary Figure S1.** The expression differences in histone chaperones between tumor and normal tissues across cancers. FC, Fold Change; T/N, Tumor/Normal.

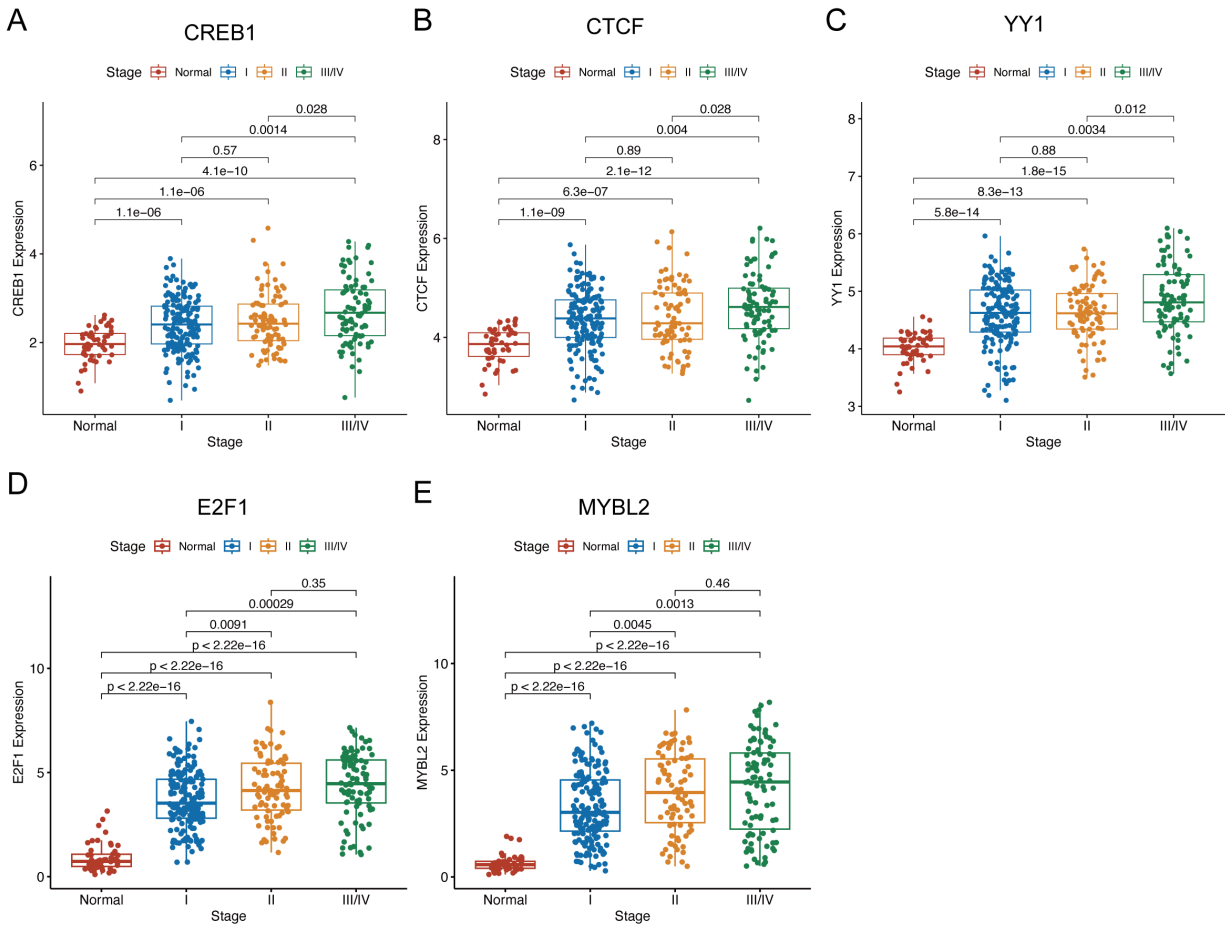

**Supplementary Figure S2.** The expression changes of potential transcription factors of H3-H4 histone chaperones with tumor progression in TCGA-LIHC. Statistical significance was computed using the Kruskal-Wallis test.

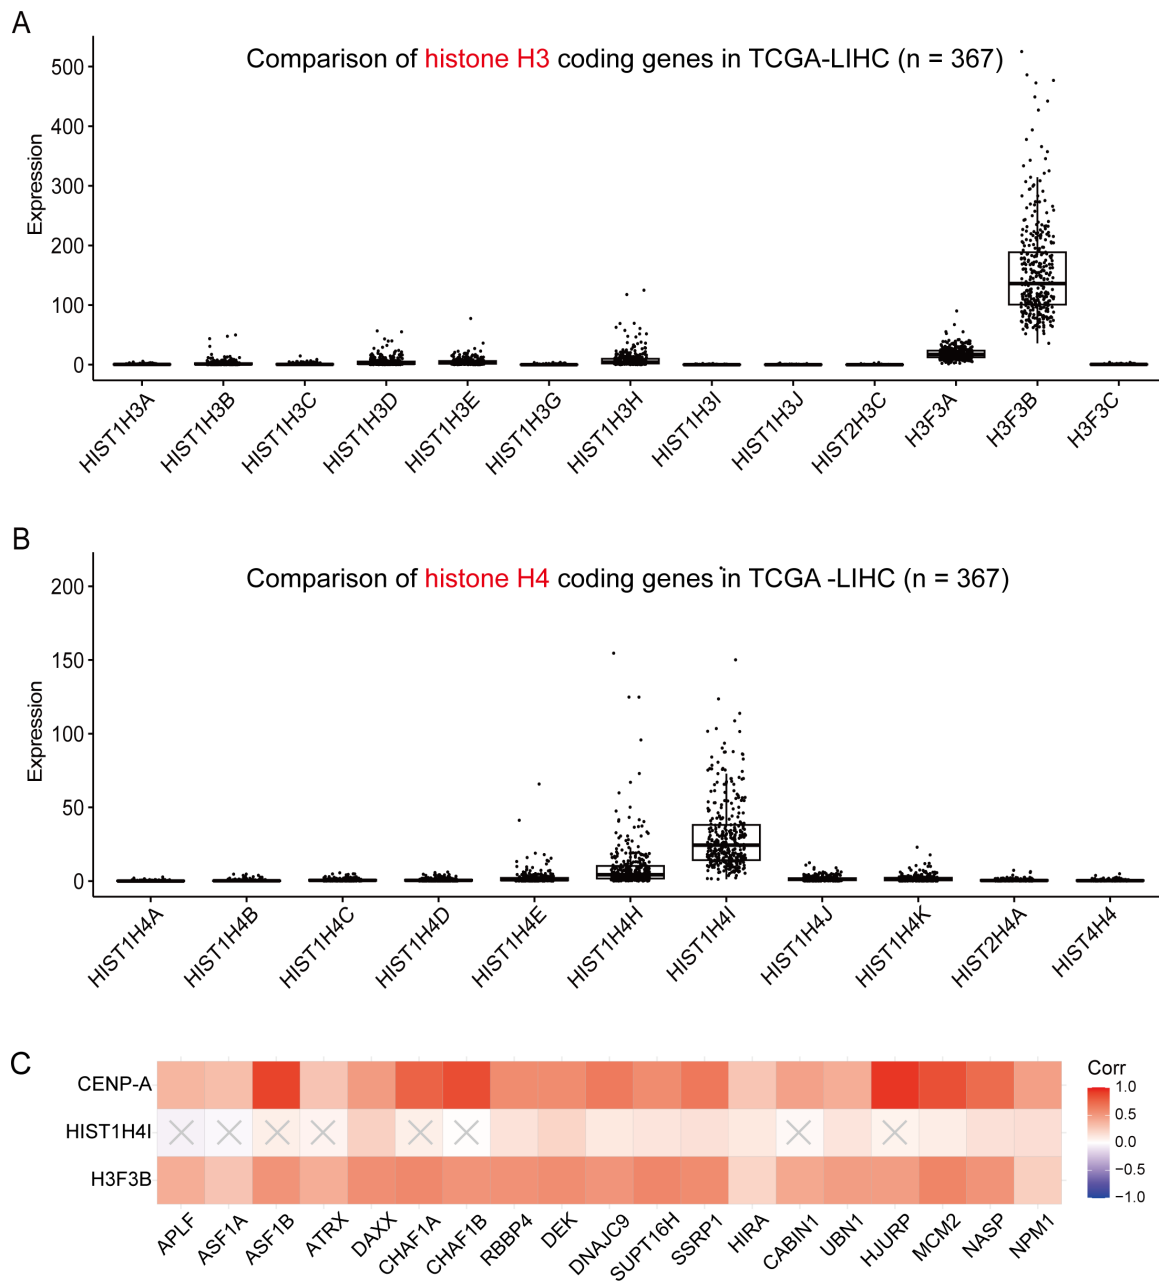

**Supplementary Figure S3.** Comparison of histone H3 (**A**) and histone H4 (**B**) coding genes in TCGA-LIHC; (**C**) Heatmap of correlation between the expression of histone H3, H4, CENP-A and histone chaperones. Corr, correlation coefficient; “x” means p-value < 0.05.

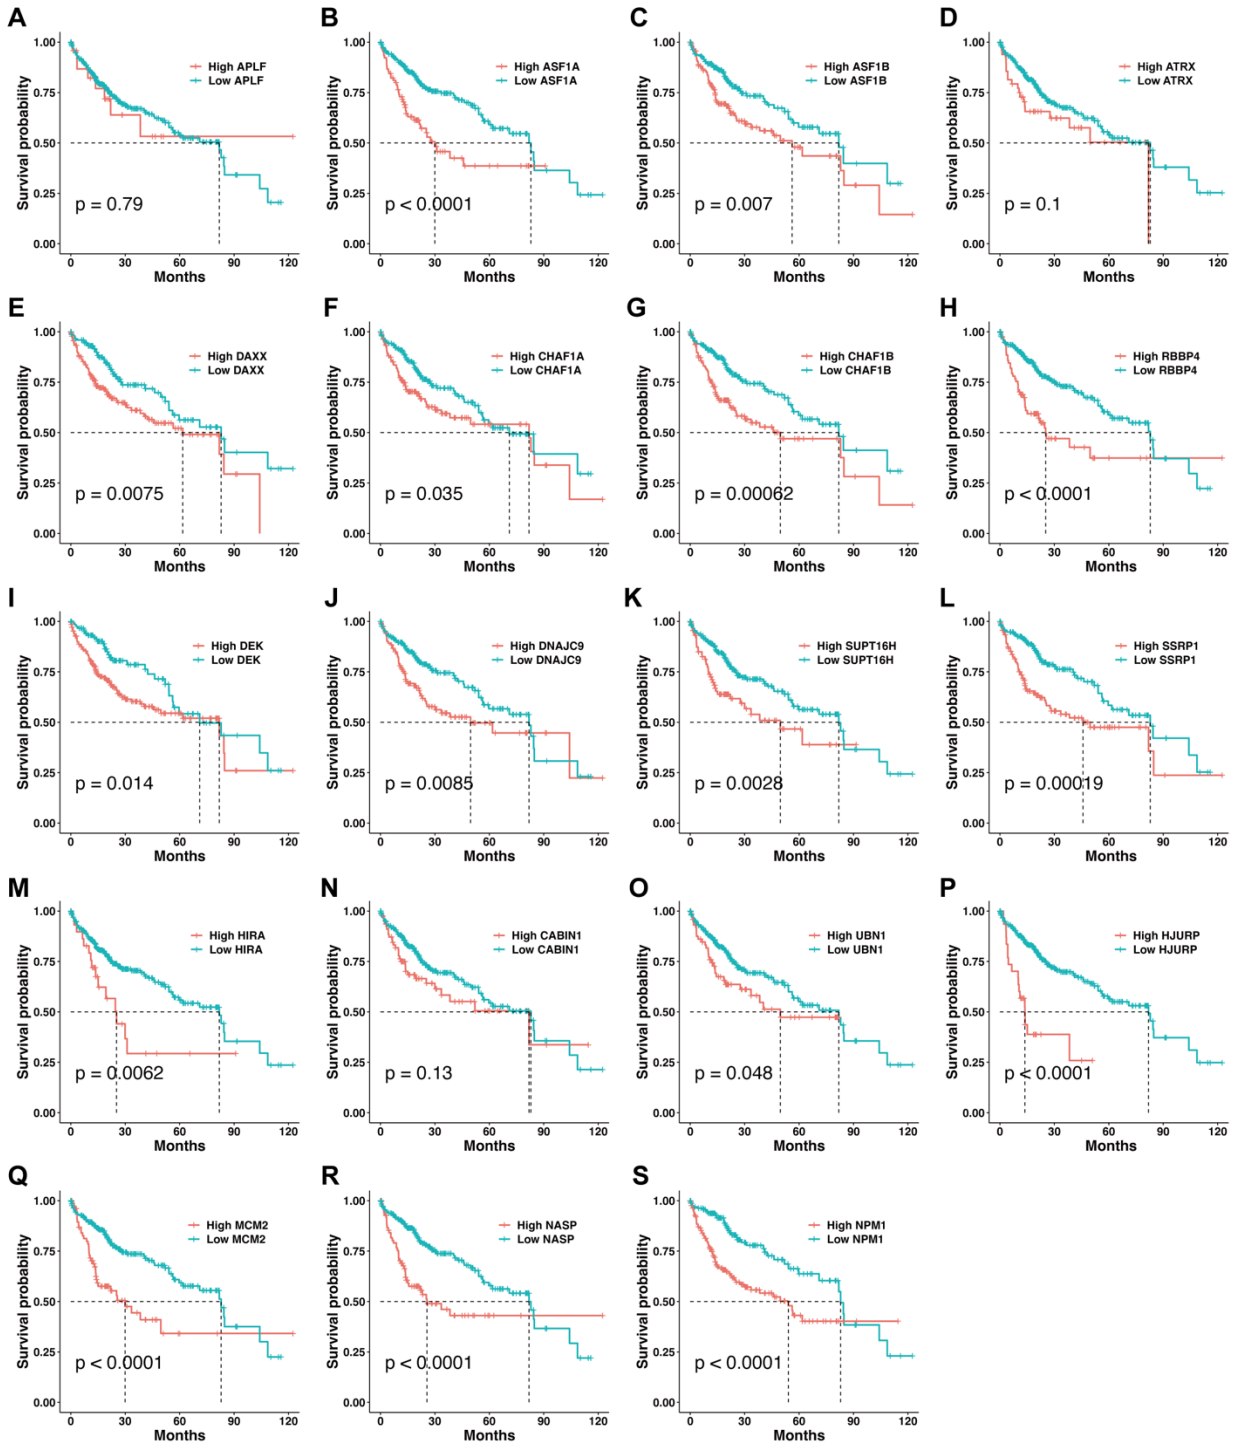

**Supplementary Figure S4.** Kaplan-Meier (KM) survival analysis of each H3-H4 histone chaperone in hepatocellular carcinoma.

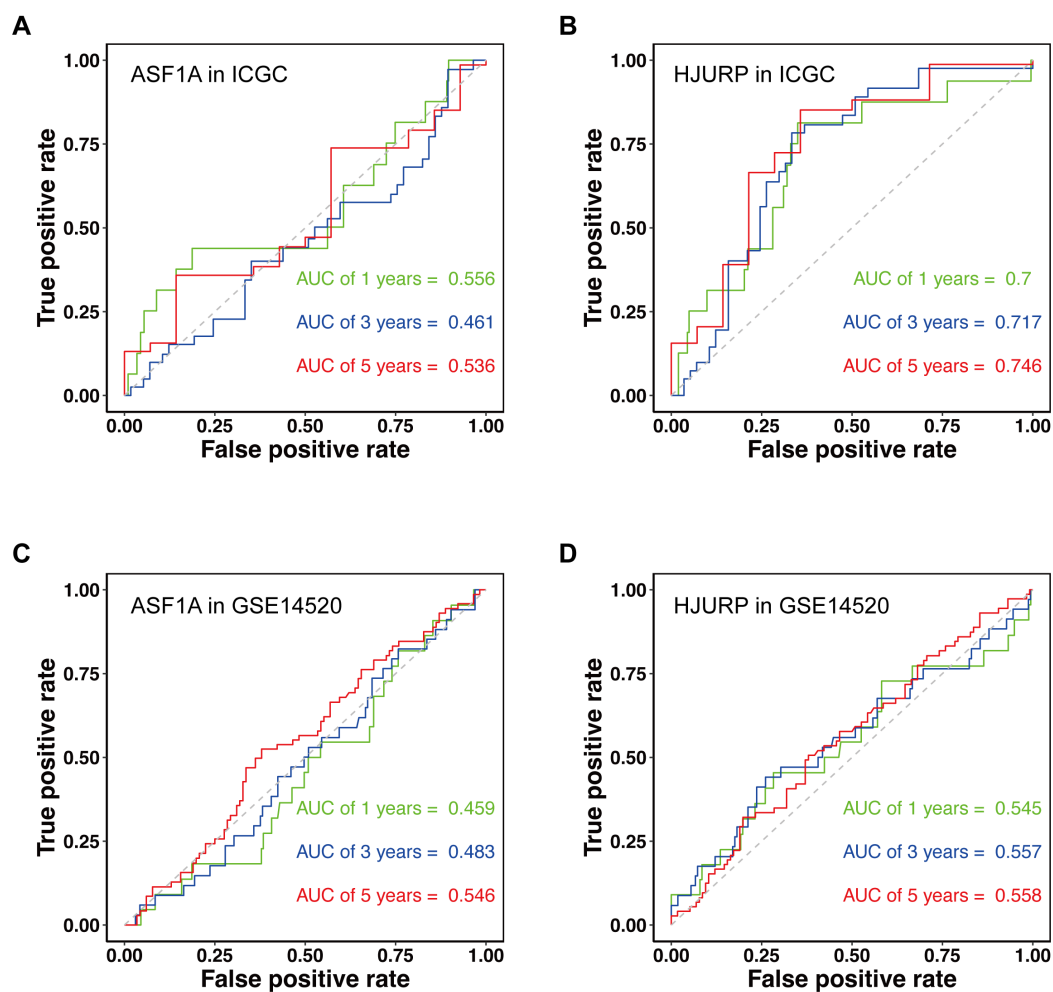

**Supplementary Figure S5.** The AUC values for ASF1A or HJURP in predicting 1, 3, and 5-year survival rates among HCC patients in ICGC (**A, B**) and GSE14520 (**C, D**) datasets.

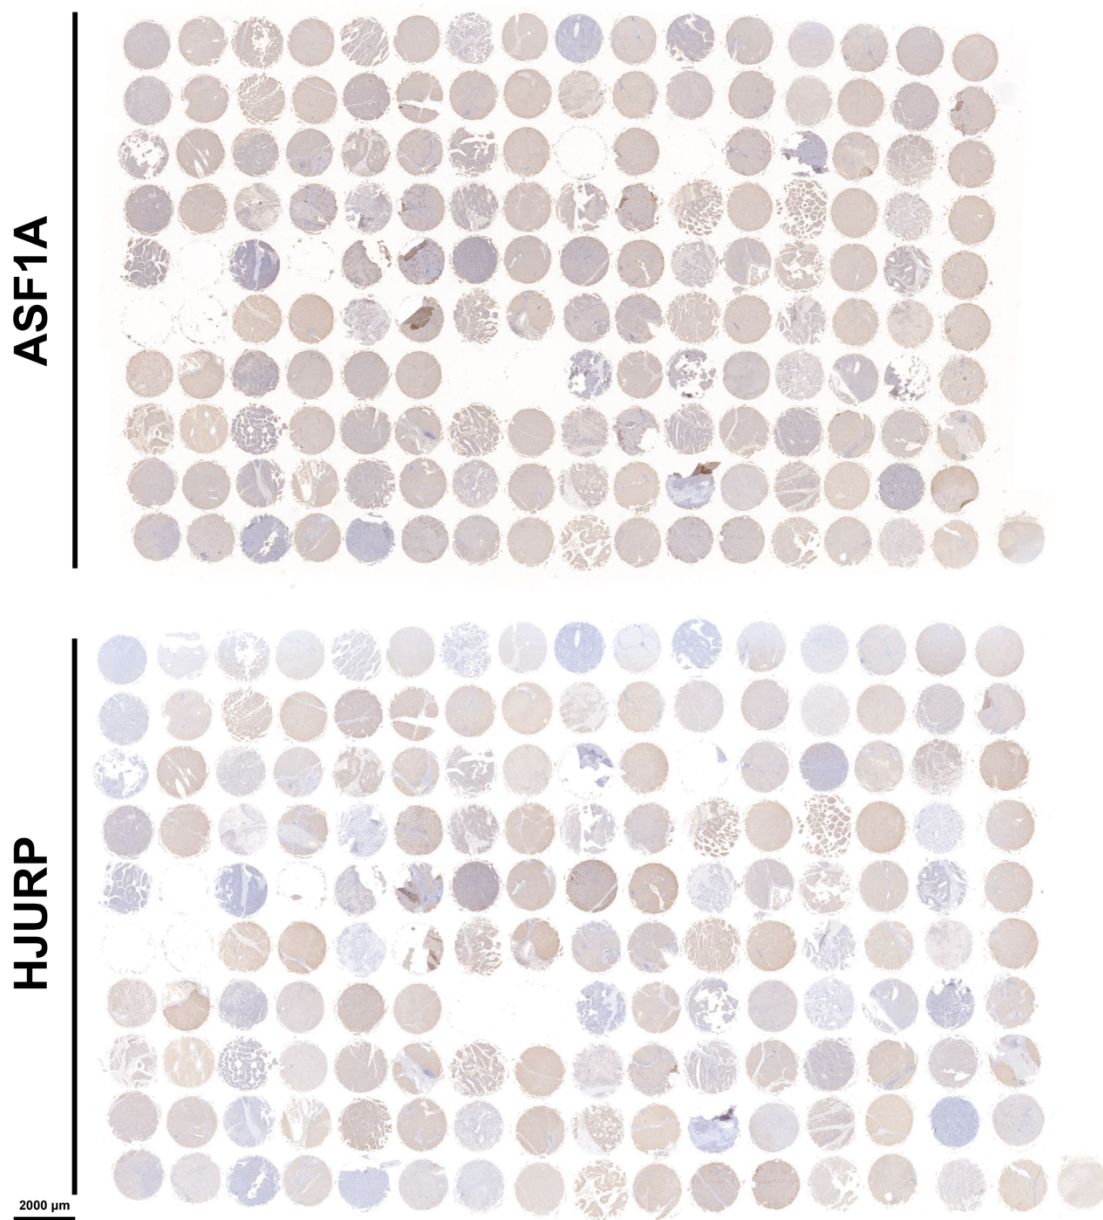

**Supplementary Figure S6.** Scan images of IHC for ASF1A and HJURP in HCC tissue microarrays.

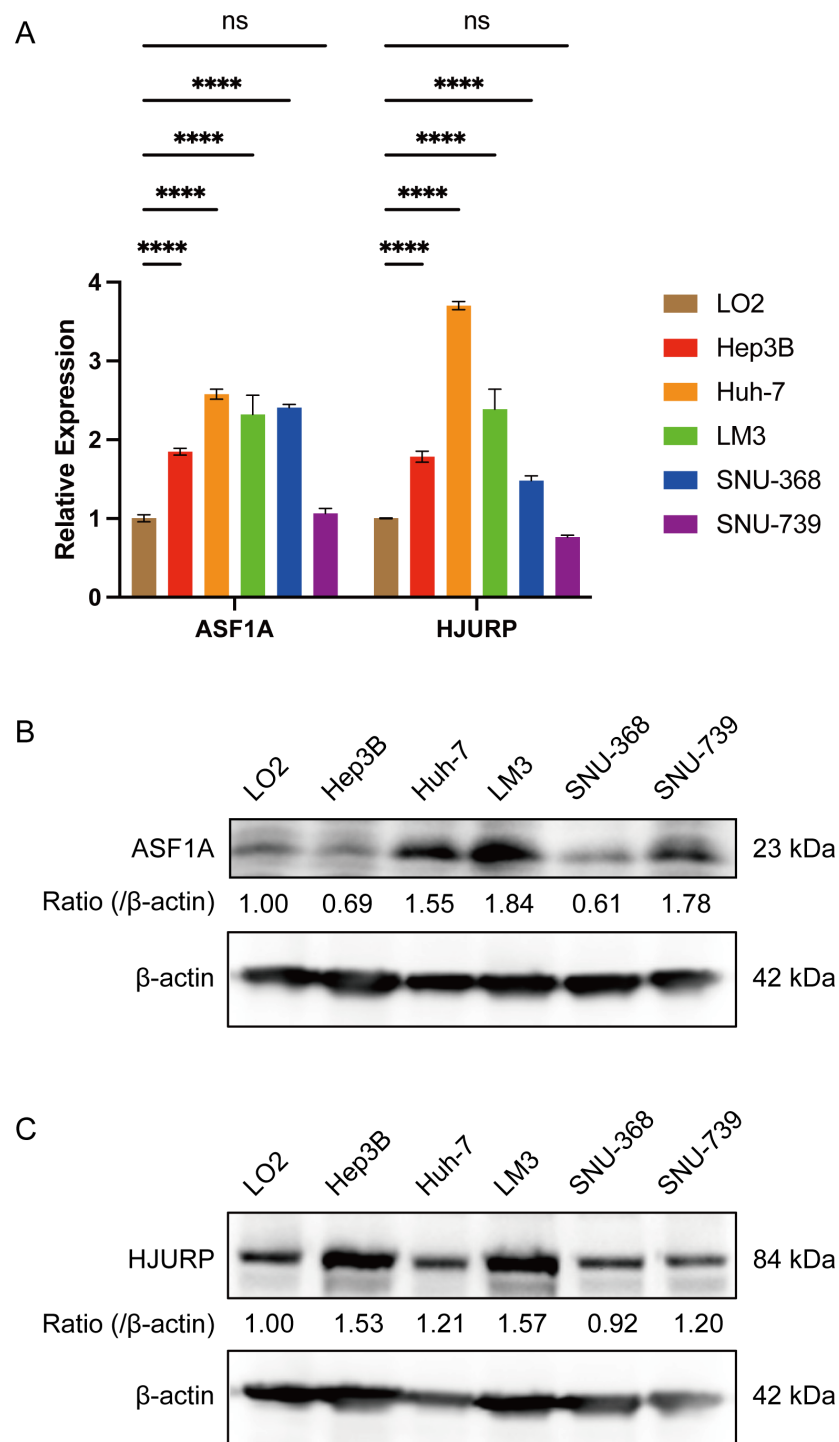

**Supplementary Figure S7. (A)** The relative expression levels of ASF1A and HJURP were detected at the RNA level by qRT-PCR. The relative expression levels of ASF1A **(B)** and HJURP **(C)** were detected at the protein level by western blotting. Statistical significance was computed using ordinary one-way ANOVA (Figure S6A); ns, not significant; \*\*\*\*,  $p < 0.0001$ .

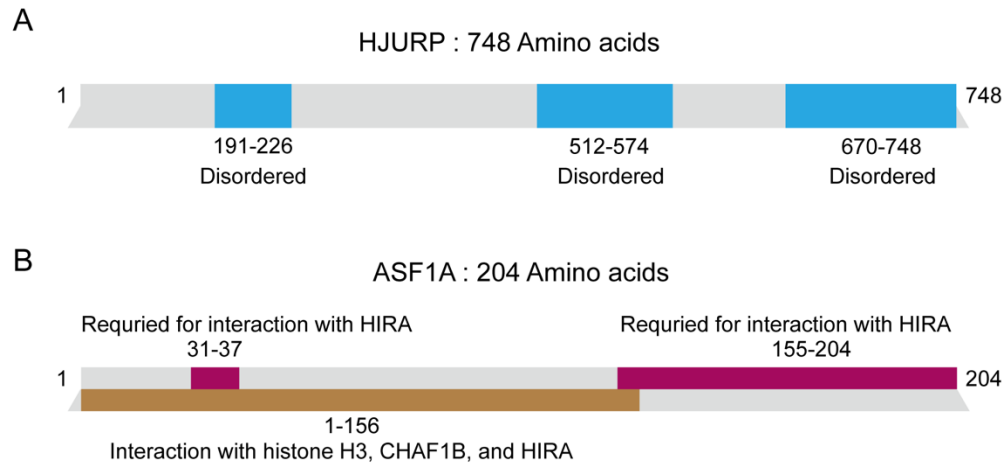

**Supplementary Figure S8.** The feature domains exist in the ASF1A and HJURP proteins from the UniPort database.

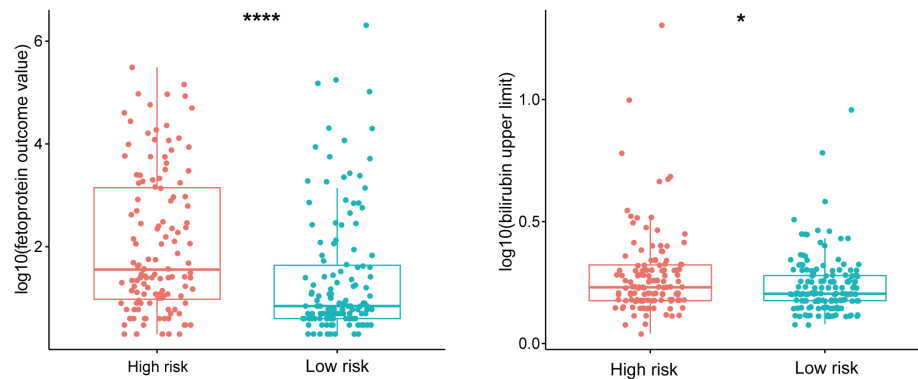

**Supplementary Figure S9.** Patients in high-risk group have higher AFP expression and bilirubin levels than patients in low-risk group. Data were from TCGA-LIHC.

## 1.2 Supplementary Tables

**Supplementary Table S1.** Clinicopathological characteristics of 62 HCC patients

| Patient NO. | Gender | Age | Stage | Location in liver                       | Pathology                            |
|-------------|--------|-----|-------|-----------------------------------------|--------------------------------------|
| 1           | Male   | 39  | II    | right lobe                              | Highly differentiated HCC            |
| 2           | Male   | 63  | I     | right lobe                              | Moderately differentiated HCC        |
| 3           | Male   | 70  | II    | right lobe                              | Moderately differentiated HCC        |
| 4           | Male   | 70  | I     | liver                                   | Highly differentiated HCC            |
| 5           | Male   | 52  | II    | liver                                   | Moderately differentiated HCC        |
| 6           | Male   | 44  | II    | liver                                   | Moderately differentiated HCC        |
| 7           | Female | 52  | II    | superior segment of right anterior lobe | Moderately differentiated HCC        |
| 8           | Male   | 59  | II    | liver                                   | Moderately differentiated HCC        |
| 9           | Male   | 41  | I     | left lobe                               | Highly differentiated HCC            |
| 10          | Male   | 71  | II    | right lobe                              | Highly/Moderately differentiated HCC |
| 11          | Male   | 61  | II    | liver                                   | Moderately differentiated HCC        |
| 12          | Male   | 48  | II    | liver                                   | Moderately differentiated HCC        |
| 13          | Male   | 41  | II    | liver                                   | Moderately differentiated HCC        |



|    |        |    |     |                      |                                      |
|----|--------|----|-----|----------------------|--------------------------------------|
| 14 | Male   | 59 | II  | right posterior lobe | HCC                                  |
| 15 | Male   | 64 | II  | right lobe           | Moderately differentiated HCC        |
| 16 | Female | 64 | II  | right lobe           | HCC                                  |
| 17 | Male   | 43 | III | right lobe           | HCC                                  |
| 18 | Male   | 34 | III | liver                | HCC                                  |
| 19 | Male   | 54 | I   | liver                | HCC                                  |
| 20 | Male   | 34 | II  | right posterior lobe | HCC                                  |
| 21 | Male   | 53 | I   | liver                | HCC                                  |
| 22 | Male   | 53 | II  | liver                | Moderately differentiated HCC        |
| 23 | Male   |    | II  | right lobe           | HCC                                  |
| 24 | Male   | 34 | II  | left lobe            | HCC                                  |
| 25 | Female | 36 | II  | right lobe           | Moderately differentiated HCC        |
| 26 | Female | 31 | II  | right lobe           | Moderately differentiated HCC        |
| 27 | Male   | 55 | II  | left lobe            | Moderately differentiated HCC        |
| 28 | Male   | 67 | II  | right lobe           | Moderately differentiated HCC        |
| 29 | Male   | 51 | II  | caudate lobe         | Moderately differentiated HCC        |
| 30 | Female | 51 | III | liver                | Moderately/Poorly differentiated HCC |
| 31 | Male   | 66 | II  | middle lobe          | Moderately differentiated HCC        |
| 32 | Male   | 44 | III | left lobe            | Moderately/Poorly differentiated HCC |
| 33 | Male   | 54 | II  | liver                | Moderately differentiated HCC        |
| 34 | Female | 72 | III | liver                | Poorly differentiated HCC            |
| 35 | Male   | 65 | I   | liver                | Highly differentiated HCC            |
| 36 | Male   | 65 | II  | liver                | HCC                                  |
| 37 | Male   | 70 | I   | liver                | Highly differentiated HCC            |
| 38 | Male   | 43 | II  | liver                | Moderately differentiated HCC        |
| 39 | Male   | 33 | III | left lobe            | Poorly differentiated HCC            |
| 40 | Male   | 52 | III | liver                | Poorly differentiated HCC            |
| 41 | Male   | 55 | II  | liver                | Moderately differentiated HCC        |
| 42 | Male   | 58 | III | liver                | Moderately differentiated HCC        |
| 43 | Male   | 58 | II  | liver                | Moderately/Poorly differentiated HCC |
| 44 | Male   | 50 | II  | liver                | Moderately differentiated HCC        |
| 45 | Male   | 27 | II  | liver                | Moderately differentiated HCC        |
| 46 | Female | 55 | II  | left lobe            | Poorly differentiated HCC            |
| 47 | Male   | 73 | II  | right anterior lobe  | Highly/Moderately differentiated HCC |
| 48 | Male   | 54 | I   | right lobe           | Highly differentiated HCC            |
| 49 | Male   | 44 | III | right lobe           | Moderately/Poorly differentiated HCC |
| 50 | Male   | 59 | II  | right femur          | Moderately differentiated HCC        |
| 51 | Male   | 72 | I   | liver                | Highly differentiated HCC            |
| 52 | Female | 38 |     | liver                | HCC                                  |
| 53 | Male   | 48 | II  | liver                | HCC                                  |
| 54 | Male   | 45 | II  | liver                | Moderately differentiated HCC        |
| 55 | Female |    | II  | liver                | Highly/Moderately differentiated HCC |
| 56 |        |    | I   | right lobe           | Highly differentiated HCC            |
| 57 | Male   | 63 | II  | left lobe            | Moderately differentiated HCC        |
| 58 | Male   | 46 | III | liver                | HCC                                  |
| 59 | Male   | 66 | I   | liver                | Highly differentiated HCC            |
| 60 | Male   | 45 | I   | right lobe           | Highly differentiated HCC            |
| 61 | Male   | 58 | I   | liver                | Highly differentiated HCC            |
| 62 | Male   | 48 | I   | liver                | Highly/Moderately differentiated HCC |

**Supplementary Table S2.** Antibodies used for immunohistochemical (IHC) and Western blotting

| No. | Antibody name             | Host/Isotype | Reactivity  | Company     | Cat No.    | Dilution                   |
|-----|---------------------------|--------------|-------------|-------------|------------|----------------------------|
| 1   | ASF1A Polyclonal antibody | Rabbit/IgG   | Human ASF1A | Proteintech | 10784-1-AP | 1:50 (IHC)<br>1:1000 (WB)  |
| 2   | HJURP Polyclonal antibody | Rabbit/IgG   | Human HJURP | Proteintech | 15283-1-AP | 1:200 (IHC)<br>1:1000 (WB) |

### Supplementary Table S3. Primers used for qRT-PCR

| Target | Primer sequence (5' to 3')      |
|--------|---------------------------------|
| ASF1A  | Forward: TGCTGGATAACCCCTTCTCCTT |
|        | Reverse: CAGGACCCACTAAAACAGAGTC |
| HJURP  | Forward: CCACGCTGACCTACGAGAC    |
|        | Reverse: CTCACCGCTTTTGAATCGGC   |
| GAPDH  | Forward: CTGGGCTACACTGAGCACC    |
|        | Reverse: AAGTGGTCGTTGAGGGCAATG  |

### Supplementary Table S4. ChEA3 predicted 23 transcription factors regulating more than 10 H3-H4 histone chaperones

| TF     | Overlapping_Genes                                                                         | Count |
|--------|-------------------------------------------------------------------------------------------|-------|
| E2F4   | DAXX,NPM1,SUPT16H,HJURP,SSRP1,DEK,HIRA,CHAF1B,CHAF1A,NASP,RBBP4,APLF,DNAJC9,ASF1B,MCM2    | 15    |
| CTCF   | NPM1,SUPT16H,ATRX,HJURP,DEK,SSRP1,CABIN1,HIRA,CHAF1B,CHAF1A,RBBP4,NASP,DNAJC9,ASF1A,ASF1B | 15    |
| E2F1   | SUPT16H,NPM1,HJURP,DEK,SSRP1,CABIN1,HIRA,CHAF1B,CHAF1A,NASP,RBBP4,DNAJC9,ASF1B,MCM2       | 14    |
| MYC    | NPM1,DAXX,SUPT16H,ATRX,DEK,SSRP1,CABIN1,HIRA,RBBP4,NASP,DNAJC9,MCM2,ASF1B                 | 13    |
| KDM5B  | SUPT16H,NPM1,ATRX,HJURP,DEK,CABIN1,HIRA,CHAF1A,NASP,RBBP4,UBN1,ASF1A,ASF1B                | 13    |
| CREM   | DAXX,SUPT16H,NPM1,SSRP1,DEK,CABIN1,RBBP4,NASP,APLF,DNAJC9,ASF1A,MCM2,ASF1B                | 13    |
| FOXO1  | NPM1,SUPT16H,HJURP,DEK,SSRP1,HIRA,CHAF1B,CHAF1A,NASP,DNAJC9,ASF1B,MCM2                    | 12    |
| SETDB1 | HIRA,DAXX,NPM1,CHAF1A,RBBP4,NASP,UBN1,DNAJC9,SSRP1,DEK,CABIN1,MCM2                        | 12    |
| JUN    | HIRA,NPM1,APLF,UBN1,HJURP,DNAJC9,SSRP1,DEK,ASF1A,MCM2,CABIN1,ASF1B                        | 12    |
| TFDP1  | HIRA,NPM1,CHAF1B,CHAF1A,NASP,HJURP,DNAJC9,DEK,SSRP1,ASF1B,MCM2                            | 11    |
| E2F8   | CHAF1B,SUPT16H,NPM1,CHAF1A,NASP,HJURP,DNAJC9,DEK,SSRP1,MCM2,ASF1B                         | 11    |
| MAZ    | HIRA,DAXX,NPM1,CHAF1A,NASP,HJURP,DNAJC9,DEK,SSRP1,CABIN1,MCM2                             | 11    |
| GATA1  | HIRA,NPM1,CHAF1B,NASP,APLF,HJURP,DNAJC9,SSRP1,ASF1A,ASF1B,CABIN1                          | 11    |
| SP1    | HIRA,DAXX,NPM1,CHAF1B,CHAF1A,NASP,UBN1,HJURP,DNAJC9,CABIN1,ASF1B                          | 11    |
| MITF   | HIRA,NPM1,DAXX,SUPT16H,CHAF1A,RBBP4,ATRX,UBN1,MCM2,CABIN1,ASF1B                           | 11    |
| IRF3   | HIRA,NPM1,CHAF1A,RBBP4,NASP,ATRX,UBN1,HJURP,ASF1B,MCM2,CABIN1                             | 11    |
| ZNF367 | NPM1,CHAF1B,CHAF1A,NASP,HJURP,DNAJC9,DEK,SSRP1,ASF1B,MCM2                                 | 10    |
| MYBL2  | HIRA,CHAF1B,NPM1,CHAF1A,NASP,HJURP,SSRP1,ASF1A,ASF1B,MCM2                                 | 10    |
| YY1    | HIRA,DAXX,NPM1,CHAF1A,RBBP4,ATRX,HJURP,DEK,SSRP1,MCM2                                     | 10    |
| TCF3   | HIRA,SUPT16H,NPM1,CHAF1A,RBBP4,NASP,HJURP,SSRP1,ASF1B,MCM2                                | 10    |
| ELK1   | HIRA,DAXX,RBBP4,NASP,APLF,HJURP,DEK,SSRP1,ASF1A,CABIN1                                    | 10    |
| TEAD4  | HIRA,CHAF1B,CHAF1A,RBBP4,APLF,DNAJC9,SSRP1,ASF1A,ASF1B,CABIN1                             | 10    |
| CREB1  | DAXX,NPM1,NASP,ATRX,UBN1,HJURP,DNAJC9,CABIN1,MCM2,ASF1B                                   | 10    |

TF, Transcription factor; Overlapping genes, the genes may be regulated by TF; count, the count of overlapping genes.

**Supplementary Table S5.** The result of correlation analysis of H3F3B, HIST1H4I and CEPN-A with each H3-H4 histone chaperone

|         | H3F3B       |          | HIST1H4I    |            | CENPA       |           |
|---------|-------------|----------|-------------|------------|-------------|-----------|
|         | Coeffecient | P.value  | Coeffecient | P.value    | Coeffecient | P.value   |
| APLF    | 0.39796728  | 9.49E-13 | -0.0472722  | 0.76794256 | 0.35759481  | 2.05E-14  |
| ASF1A   | 0.28862378  | 5.58E-10 | -0.032481   | 0.93133314 | 0.32099314  | 7.52E-13  |
| ASF1B   | 0.52984958  | 7.01E-27 | 0.08267888  | 0.13632024 | 0.88950607  | 8.01E-113 |
| ATRX    | 0.40320921  | 1.33E-16 | 0.05247883  | 0.18089285 | 0.29151822  | 2.35E-09  |
| DAXX    | 0.54807407  | 1.04E-28 | 0.22981967  | 1.80E-06   | 0.49156182  | 9.41E-25  |
| CHAF1A  | 0.58336338  | 7.06E-33 | 0.08001562  | 0.12481189 | 0.76145137  | 4.56E-70  |
| CHAF1B  | 0.53162171  | 5.52E-26 | 0.01471718  | 0.83984137 | 0.84856027  | 7.17E-86  |
| RBBP4   | 0.53583228  | 2.08E-26 | 0.1440999   | 0.00302156 | 0.56623542  | 9.88E-32  |
| DEK     | 0.5629125   | 5.62E-31 | 0.20584278  | 7.57E-05   | 0.56960672  | 3.49E-31  |
| DNAJC9  | 0.52162629  | 1.08E-24 | 0.10797219  | 0.02604225 | 0.65405497  | 3.59E-42  |
| SUPT16H | 0.59339443  | 1.00E-33 | 0.12792304  | 0.00589385 | 0.56810517  | 2.30E-34  |
| SSRP1   | 0.56626699  | 6.92E-32 | 0.15383892  | 0.00060388 | 0.66081525  | 5.05E-47  |
| HIRA    | 0.21070201  | 7.22E-06 | 0.11221579  | 0.02776582 | 0.28230762  | 1.53E-09  |
| CABIN1  | 0.43133352  | 1.28E-18 | 0.02887132  | 0.3721401  | 0.46328629  | 7.12E-23  |
| UBN1    | 0.47949704  | 6.45E-22 | 0.12987333  | 0.00977644 | 0.40092894  | 2.46E-16  |
| HJURP   | 0.47718432  | 7.12E-21 | 0.06168509  | 0.23252917 | 0.93467114  | 8.55E-150 |
| MCM2    | 0.60413641  | 4.21E-34 | 0.09140306  | 0.04782726 | 0.84264449  | 3.12E-91  |
| NASP    | 0.53154349  | 6.92E-28 | 0.14725797  | 0.00217561 | 0.72125445  | 6.41E-63  |
| NPM1    | 0.24410475  | 4.96E-07 | 0.1584829   | 0.00191686 | 0.46829587  | 4.32E-21  |

**Supplementary Table S6.** The results of multivariate Cox analysis of stages and H3-H4 histone chaperones in TCGA-LIHC

| Variates | HR (95% CI for HR)     | P.value | Significance |
|----------|------------------------|---------|--------------|
| Stage I  | 1                      |         |              |
| II       | 1.0707 (0.6403-1.790)  | 0.79458 | ns           |
| III      | 1.7806 (1.1145-2.845)  | 0.0158  | *            |
| IV       | 7.6157 (2.2800-25.438) | <0.001  | ***          |
| ASF1A    | 1.3925 (1.0955-1.778)  | 0.02402 | *            |
| HJURP    | 1.3174 (1.1488-1.569)  | 0.01518 | *            |
| NASP     | 0.9962 (0.7244-1.370)  | 0.98155 | ns           |
| NPM1     | 1.2953 (0.9872-1.700)  | 0.06194 | ns           |

HR, hazard Ratio; 95% CI, 95% confidence interval; ns, not significant; TCGA-LIHC, The Cancer Genome Atlas Liver Hepatocellular Carcinoma
